# Supplementary material for: Group 10–group 14 metal complexes [E–TM]IV: the role of the group 14 site as an L, X and Z-type ligand
Source: Royal Society of Chemistry journal article supplement (doi:10.1039/c6dt01621a), 2016-01-01
Supplement: c6dt01621a1.pdf [file c6dt01621a1.pdf]

## **Supporting information material for**

### **Group 10 – group 14 metal complexes [E–TM]<sup>IV</sup>: The role of the group 14 site as an L, X and Z-type ligand**

**Erik Wächtler, Robert Gericke, Erica Brendler, Birgit Gerke, Thorsten Langer, Rainer Pöttgen, Lyuben Zhechkov, Thomas Heine and Jörg Wagler\***

#### **Table of content:**

Synthesis and characterisation of the complexes  $\text{Sn}_2(\text{L}^b)_2$ ,  $\text{Sn}(\text{L}^b)_2$  and  $[\text{Cl}_2\text{Sn}(\mu\text{-bztzS})_2\text{NiPPH}_3]$ .

Molecular structures of the complexes  $\text{Sn}_2(\text{L}^b)_2$ ,  $\text{Sn}(\text{L}^b)_2$ ,  $[\text{Ni}_2(\text{bztzS})_4]$ ,  $[\text{Cl}_2\text{Sn}(\mu\text{-bztzS})_2\text{NiPPH}_3]$  and  $\text{O}[\text{ClGe}(\mu\text{-pyS})_2\text{PdPPH}_3]_2$  in the crystal.

Parameters of data collection and structure refinement for the structures of **2**, **3**, **4**, **9**, **10** · 2 THF, **11** · DCM, **12**, **13** · 2 EtOH · DCM,  $\text{Sn}_2(\text{L}^b)_2$ ,  $\text{Sn}(\text{L}^b)_2$  · 2 MeOH,  $[\text{Ni}_2(\text{bztzS})_4]$ ,  $[\text{Cl}_2\text{Sn}(\mu\text{-bztzS})_2\text{NiPPH}_3]$  and  $\text{O}[\text{ClGe}(\mu\text{-pyS})_2\text{PdPPH}_3]_2$ .

<sup>119</sup>Sn Mössbauer spectra of compounds **2**, **3**, **9**, **10**, **11**, **12**, **13**,  $[\text{Cl}_2\text{Sn}(\mu\text{-bztzS})_2\text{NiPPH}_3]$ ,  $\text{Sn}_2(\text{L}^b)_2$  and  $\text{Sn}(\text{L}^b)_2$  and parameters of the fitting procedure

Quantum chemical calculations

Optimized molecular structure of compound **5**.

NLMOs of the E–TM bond of compounds **2**, **5**, **6**, **7**, **8**, **9**, **10**, **11**, **13** and  $[\text{Cl}_2\text{Sn}(\mu\text{-bztzS})_2\text{NiPPH}_3]$ .

Atomic coordinates of optimized  $\text{SnCl}_4$ ,  $\text{SnCl}_5^-$ ,  $\text{SnCl}_6^{2-}$ ,  $\text{SnCl}_3^-$ ,  $\text{SnCl}_4^{2-}$ .

References

Synthesis and characterisation of the complexes  $\text{Sn}_2(\text{L}^b)_2$ ,  $\text{Sn}(\text{L}^b)_2$  and  $[\text{Cl}_2\text{Sn}(\mu\text{-bztzS})_2\text{Ni-PPh}_3]$ :

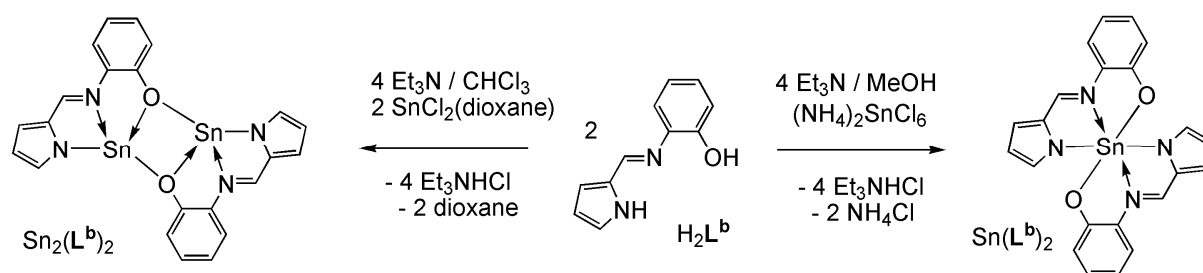

**Scheme SII** Synthesis of  $\text{Sn}_2(\text{L}^b)_2$  and  $\text{Sn}(\text{L}^b)_2$ .

**$\text{Sn}_2(\text{L}^b)_2$ .**  $\text{SnCl}_2(\text{dioxane})$  (0.30 g, 1.08 mmol) was layered with chloroform (3 mL) followed by a layer of a chloroform solution (5 mL) of  $\text{H}_2\text{L}^b$  (0.20 g, 1.08 mmol) and triethylamine (0.30 g, 2.94 mmol). Crystals (suitable for X-ray crystallography) formed upon storage at room temperature, and after 10 d the product was isolated by decantation, washed with chloroform (3 mL) and dried *in vacuo*. Yield: 0.24 g (0.39 mmol, 74%). The compound is basically insoluble in most common organic solvents (such as toluene, THF, chloroform, acetonitrile, DMSO).

MP: not observed (stable up to 250°C).

$^{119}\text{Sn}$  MAS NMR (149.17 MHz,  $\nu_{\text{rot}}$ : 14 and 15 kHz):  $\delta = -399$  ppm;

$^{119}\text{Sn}$  Mössbauer ( $\text{Ca}^{119\text{m}}\text{SnO}_3$ , 78 K):  $\delta = 2.94(1)$  mm  $\text{s}^{-1}$ ,  $\Delta = 1.97(1)$  mm  $\text{s}^{-1}$ .

Anal. calcd. for  $\text{C}_{22}\text{H}_{16}\text{N}_4\text{O}_2\text{Sn}_2$  (605.81 g  $\text{mol}^{-1}$ ): C 43.62, H 2.66, N 9.25; found: C 43.54, H 2.58, N 9.19%.

**$\text{Sn}(\text{L}^b)_2$ .**  $(\text{NH}_4)_2\text{SnCl}_6$  (0.49 g, 1.34 mmol),  $\text{H}_2\text{L}^b$  (0.50 g, 2.69 mmol) and triethylamine (0.56 g, 5.50 mmol) were stirred in methanol (25 mL) at room temperature for 4 h whereby an orange precipitate formed. This was filtered off, washed with methanol (4 mL) and dried *in vacuo*. Yield: 0.39 g (0.75 mmol, 56%). Crystals for X-ray structure determination were obtained by recrystallisation from hot methanol (in this case the product crystallised as methanol solvate with one molecule of methanol per complex molecule).

MP: not observed (stable up to 300°C).

$^1\text{H}$  NMR (400.13 MHz,  $\text{CDCl}_3$ ):  $\delta = 6.31$  (m, 1H), 6.77 (m, 1H), 6.83 (m, 1H), 6.90 (m, 1H), 6.98 (m, 1H), 7.10 (m, 1H), 7.40 (m, 1H) (Aryl), 8.68 ppm (s, 1H,  $\text{HC}=\text{N}$ , satellites  $^3J_{\text{1H-}^{117/119}\text{Sn}} = 108$  Hz);

$^{13}\text{C}\{^1\text{H}\}$  NMR (100.63 MHz,  $\text{CDCl}_3$ ):  $\delta = 113.7$ , 116.6, 117.6, 118.4, 122.3, 127.7, 128.9, 133.0, 136.3 (Aryl), 143.2 ( $\text{C}=\text{N}$ ), 155.1 ppm ( $\text{C}-\text{O}$ );

$^{119}\text{Sn}\{^1\text{H}\}$  NMR (149.21 MHz,  $\text{CDCl}_3$ ):  $\delta = -504.5$  ppm;

$^{119}\text{Sn}$  Mössbauer ( $\text{Ca}^{119\text{m}}\text{SnO}_3$ , 78 K):  $\delta = 0.29(1)$  mm  $\text{s}^{-1}$ ,  $\Delta = 0.43(1)$  mm  $\text{s}^{-1}$ .

Anal. calcd. for  $C_{22}H_{16}N_4O_2Sn$  ( $487.10 \text{ g mol}^{-1}$ ): C 54.25, H 3.31, N 11.50. found: C 54.11, H 3.20, N 11.47%.

$[Ni_2(bztzS)_4]$  was prepared according to a method reported by Ballester et al.<sup>1</sup>

**$[Cl_2Sn(\mu\text{-bztzS})_2NiPPh_3]$** .  $[Ni_2(bztzS)_4]$  (200 mg, 510  $\mu\text{mol}$ ) was layered with THF (3 mL) and thereafter with a THF solution (5 mL) of  $PPh_3$  (140 mg, 550  $\mu\text{mol}$ ) and  $SnCl_2$ (dioxane) (140 mg, 510  $\mu\text{mol}$ ). The product formed as a crystalline material (containing X-ray quality crystals) within several days. After 10 d, the supernatant was decanted off and the crystals washed with THF (3 mL) and dried under vacuum. Yield: 240 mg (0.28 mmol, 56%). The compound is insoluble in common organic solvents.

MP: not observed (decomposition  $> 200^\circ\text{C}$ ).

$^{31}\text{P}$  MAS NMR (162.02 MHz,  $\nu_{rot}$ : 10 kHz):  $\delta = 26.0$  ppm (satellites:  $^2J_{31\text{P}-119\text{Sn}} = 2842$  Hz,  $^2J_{31\text{P}-117\text{Sn}} = 2709$  Hz);

$^{119}\text{Sn}$  MAS NMR (149.17 MHz,  $\nu_{rot}$ : 14 and 15 kHz):  $\delta = -470.3$  ppm (d);

$^{119}\text{Sn}$  Mössbauer ( $Ca^{119m}SnO_3$ , 78 K):  $\delta = 1.70(1) \text{ mm s}^{-1}$ ,  $\Delta = 1.67(1) \text{ mm s}^{-1}$ .

Anal. calcd. for  $C_{32}H_{23}Cl_2N_2NiPS_4Sn$  ( $843.08 \text{ g mol}^{-1}$ ): C 45.59, H 2.75, N 3.32; found: C 45.78, H 2.97, N 3.29%.

Molecular structures of the complexes  $\text{Sn}_2(\text{L}^b)_2$ ,  $\text{Sn}(\text{L}^b)_2$ ,  $[\text{Ni}_2(\text{bztzS})_4]$ ,  $[\text{Cl}_2\text{Sn}(\mu\text{-bztzS})_2\text{NiPPh}_3]$  and  $\text{O}[\text{ClGe}(\mu\text{-pyS})_2\text{PdPPh}_3]_2$  in the crystal:

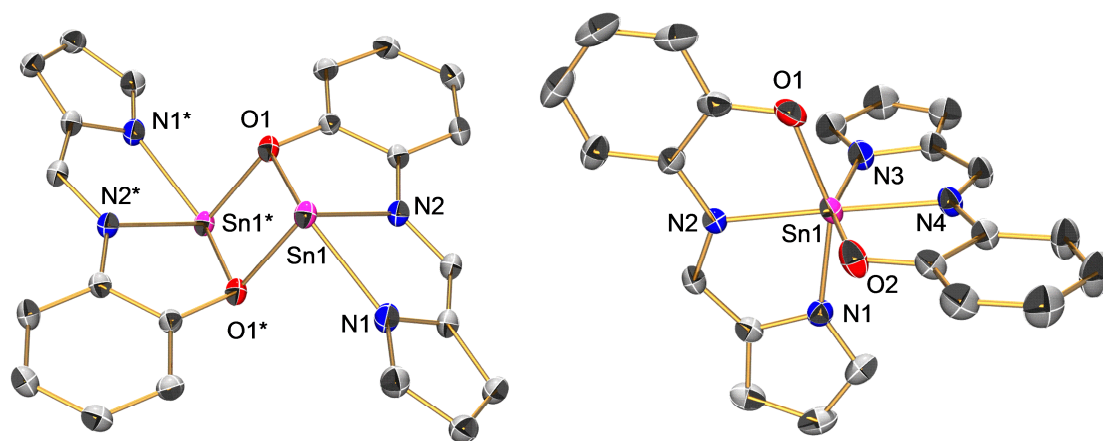

**Fig. S11** Molecular structures of complexes  $\text{Sn}_2(\text{L}^b)_2$  (left) and  $\text{Sn}(\text{L}^b)_2$  (right) in the crystal (ellipsoids set at 50% probability, hydrogen atoms are omitted). Selected bond lengths [ $\text{\AA}$ ] for  $\text{Sn}_2(\text{L}^b)_2$ : Sn1-O1 2.510(1), Sn1-N1 2.240(1), Sn1-N2 2.234(1), Sn1-O1\* 2.153(1), symmetry operation \*: -x, 2-y, 1-z;  $\text{Sn}(\text{L}^b)_2$ : Sn1-O1 2.064(1), Sn1-N1 2.142(1), Sn1-N2 2.135(1), Sn1-O2 2.058(1), Sn1-N3 2.124(1), Sn1-N4 2.136(1).

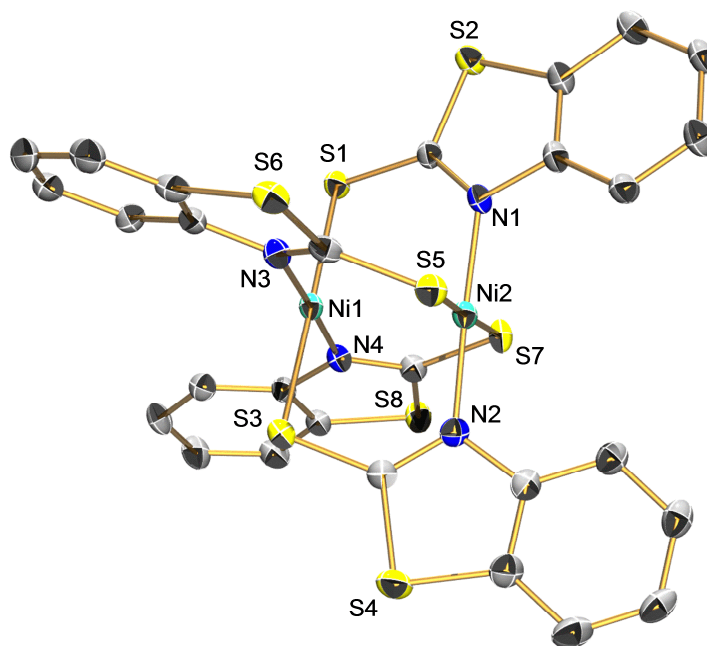

**Fig. S12** Molecular structure of  $[\text{Ni}_2(\text{bztzS})_4]$  in the crystal (ellipsoids set at 50% probability, hydrogen atoms are omitted). Selected bond lengths [ $\text{\AA}$ ]: Ni1-S1 2.227(1), Ni1-S3 2.234(1), Ni1-N3 1.881(3), Ni1-N4 1.879(3), Ni2-S5 2.247(1), Ni2-S7 2.239(1), Ni2-N1 1.900(3), Ni2-N2 1.893(3), Ni1...Ni2 2.5681(6).

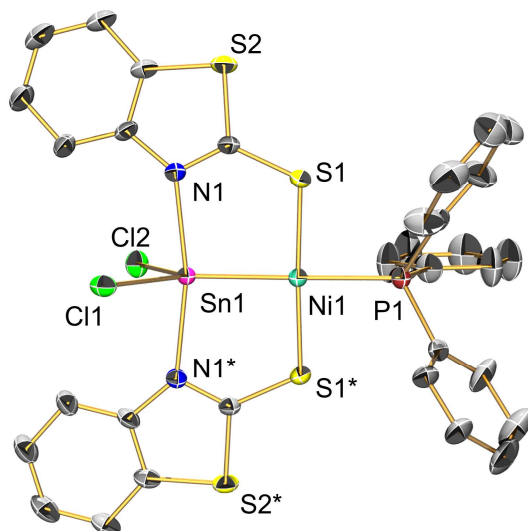

**Fig. SI3** Molecular structure of  $[\text{Cl}_2\text{Sn}(\mu\text{-bztzS})_2\text{NiPPh}_3]$  in the crystal (ellipsoids set at 50% probability, hydrogen atoms are omitted). Selected bond lengths [ $\text{\AA}$ ]: Ni1-Sn1 2.4494(7), Ni1-S1 2.1623(9), Ni1-P1 2.2362(14), Sn1-N1 2.290(3), Sn1-Cl1 2.3814(12), Sn1-Cl2 2.3881(12), symmetry operation \*:  $x, 1-y, z$ .

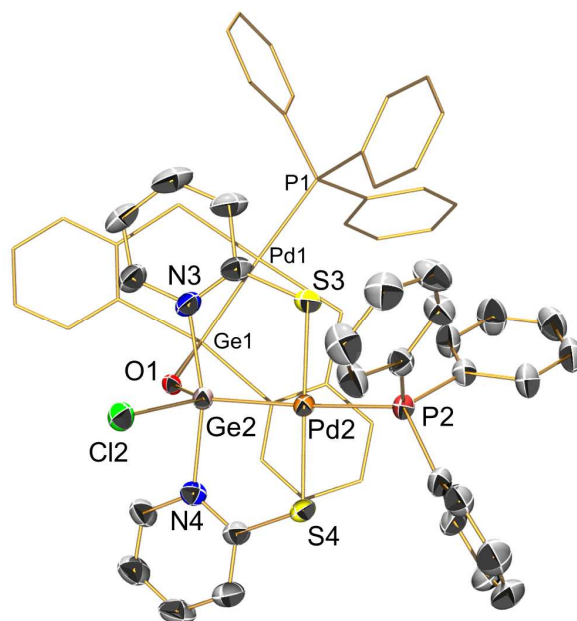

**Fig. SI4** Molecular structure of  $\text{O}[\text{ClGe}(\mu\text{-pyS})_2\text{PdPPh}_3]_2$  in the crystal (ellipsoids set at 50% probability, hydrogen atoms are omitted). For clarity one part of the molecule is displayed as stick model. Selected bond lengths [ $\text{\AA}$ ]: Pd1-Ge1 2.381(2), Pd1-S1 2.302(2), Pd1-S2 2.298(2), Pd1-P1 2.381(2), Ge1-N1 2.192(3), Ge1-N2 2.168(3), Ge1-Cl1 2.286(3), Ge1-O1 1.761(3), Pd2-Ge2 2.3758(4), Pd2-S3 2.298(1), Pd2-S4 2.301(1), Pd2-P2 2.356(1), Ge2-N3 2.154(3), Ge2-N4 2.182(3), Ge2-Cl2 2.230(1), Ge2-O1 1.793(2). (Note: These labels for Pd, Ge, Cl, S, P and O correspond to the labels with disorder group index A in the CIF, e.g., Pd1 = Pd1A, for clarity this index has been omitted in the graphic).

Parameters of data collection and structure refinement for the structures of **2**, **3**, **4**, **9**, **10** · 2 THF, **11** · DCM, **12**, **13** · 2 EtOH · DCM, Sn<sub>2</sub>(L<sup>b</sup>)<sub>2</sub>, Sn(L<sup>b</sup>)<sub>2</sub> · MeOH, [Ni<sub>2</sub>(bztzS)<sub>4</sub>], [Cl<sub>2</sub>Sn(μ-bztzS)<sub>2</sub>NiPPh<sub>3</sub>] and O[ClGe(μ-pyS)<sub>2</sub>PdPPh<sub>3</sub>]<sub>2</sub>:

**Table S11** Parameters of data collection and structure refinement for the structures of **2**, **3**, **4** and O[ClGe(μ-pyS)<sub>2</sub>PdPPh<sub>3</sub>].

|                                                                | <b>2</b>                                                                            | <b>3</b>                                                                            | <b>4</b>                                                                           | O[ClGe(μ-pyS) <sub>2</sub> Pd-PPh <sub>3</sub> ] <sub>2</sub>                                                   |
|----------------------------------------------------------------|-------------------------------------------------------------------------------------|-------------------------------------------------------------------------------------|------------------------------------------------------------------------------------|-----------------------------------------------------------------------------------------------------------------|
| Empirical formula                                              | C <sub>28</sub> H <sub>23</sub> Cl <sub>2</sub> N <sub>2</sub> NiPS <sub>2</sub> Sn | C <sub>28</sub> H <sub>23</sub> Cl <sub>2</sub> N <sub>2</sub> PPtS <sub>2</sub> Sn | C <sub>28</sub> H <sub>23</sub> Cl <sub>2</sub> GeN <sub>2</sub> PPdS <sub>2</sub> | C <sub>56</sub> H <sub>46</sub> Cl <sub>2</sub> Ge <sub>2</sub> N <sub>2</sub> OP <sub>2</sub> PdS <sub>4</sub> |
| Formula weight                                                 | 730.87                                                                              | 867.25                                                                              | 732.46                                                                             | 1410.03                                                                                                         |
| <i>T</i> (K)                                                   | 200(2)                                                                              | 200(2)                                                                              | 200(2)                                                                             | 200(2)                                                                                                          |
| $\lambda$ (Å)                                                  | 0.71073                                                                             |                                                                                     |                                                                                    |                                                                                                                 |
| Crystal system                                                 | Monoclinic                                                                          | Triclinic                                                                           | Triclinic                                                                          | Monoclinic                                                                                                      |
| Space group                                                    | <i>P</i> 2 <sub>1</sub> / <i>n</i>                                                  | <i>P</i> -1                                                                         | <i>P</i> -1                                                                        | <i>P</i> 2 <sub>1</sub> / <i>n</i>                                                                              |
| Unit cell dimensions.                                          |                                                                                     |                                                                                     |                                                                                    |                                                                                                                 |
| <i>a</i> (Å)                                                   | 15.6578(4)                                                                          | 8.7609(3)                                                                           | 11.7504(6)                                                                         | 9.5367(2)                                                                                                       |
| <i>b</i> (Å)                                                   | 16.2539(5)                                                                          | 11.8010(4)                                                                          | 11.9994(6)                                                                         | 22.0550(4)                                                                                                      |
| <i>c</i> (Å)                                                   | 23.8975(7)                                                                          | 15.1557(6)                                                                          | 12.0861(6)                                                                         | 26.8568(6)                                                                                                      |
| $\alpha$ (°)                                                   | 90                                                                                  | 96.445(3)                                                                           | 60.360(4)                                                                          | 90                                                                                                              |
| $\beta$ (°)                                                    | 106.036(2)                                                                          | 93.501(3)                                                                           | 81.827(4)                                                                          | 96.955(2)                                                                                                       |
| $\gamma$ (°)                                                   | 90                                                                                  | 107.876(3)                                                                          | 75.635(4)                                                                          | 90                                                                                                              |
| <i>V</i> (Å <sup>3</sup> )                                     | 5845.3(3)                                                                           | 1474.26(9)                                                                          | 1434.44(12)                                                                        | 5607.3(2)                                                                                                       |
| <i>Z</i> / <i>D</i> <sub>c</sub> (g cm <sup>-3</sup> )         | 8 / 1.66                                                                            | 2 / 1.95                                                                            | 2 / 1.70                                                                           | 4 / 1.67                                                                                                        |
| $\mu$ (mm <sup>-1</sup> )                                      | 1.9                                                                                 | 6.0                                                                                 | 2.1                                                                                | 2.0                                                                                                             |
| <i>F</i> (000)                                                 | 2912                                                                                | 828                                                                                 | 728                                                                                | 2808                                                                                                            |
| Crystal size (mm)                                              | 0.30×0.30×0.05                                                                      | 0.30×0.25×0.20                                                                      | 0.45×0.35×0.20                                                                     | 0.30×0.25×0.20                                                                                                  |
| $\theta$ range for data collection                             | 2.5-27.0                                                                            | 1.8-32.0                                                                            | 2.7-32.0                                                                           | 2.4-27.0                                                                                                        |
| Reflections collected                                          | 61845                                                                               | 42811                                                                               | 29868                                                                              | 130137                                                                                                          |
| Independent reflections / <i>R</i> (int)                       | 12752 / 0.0460                                                                      | 10237 / 0.0353                                                                      | 9947 / 0.0228                                                                      | 12231 / 0.0670                                                                                                  |
| Completeness to $\theta_{\max}$                                | 99.9%                                                                               | 99.9%                                                                               | 99.9%                                                                              | 99.9%                                                                                                           |
| Refinement                                                     | Full-matrix least-squares on <i>F</i> <sup>2</sup>                                  |                                                                                     |                                                                                    |                                                                                                                 |
| Data / restraints / parameters                                 | 12752 / 0 / 667                                                                     | 10237 / 0 / 335                                                                     | 9947 / 0 / 334                                                                     | 12231 / 1 / 712                                                                                                 |
| Goodness-of-fit on <i>F</i> <sup>2</sup>                       | 1.025                                                                               | 1.101                                                                               | 1.043                                                                              | 1.042                                                                                                           |
| <i>R</i> 1 / <i>wR</i> 2 [ <i>I</i> > 2 $\sigma$ ( <i>I</i> )] | 0.0255 / 0.0523                                                                     | 0.0262 / 0.0646                                                                     | 0.0212 / 0.0504                                                                    | 0.0373 / 0.0857                                                                                                 |
| <i>R</i> 1 / <i>wR</i> 2 (all data)                            | 0.0411 / 0.0568                                                                     | 0.0294 / 0.0661                                                                     | 0.0261 / 0.0522                                                                    | 0.0542 / 0.0916                                                                                                 |
| Largest diff. peak / hole [e Å <sup>-3</sup> ]                 | 0.43 / -0.38                                                                        | 1.26 / -2.02                                                                        | 0.42 / -0.48                                                                       | 0.64 / -0.90                                                                                                    |

**Table S12** Parameters of data collection and structure refinement for the structures of [Cl<sub>2</sub>Sn(μ-bztzS)<sub>2</sub>NiPPh<sub>3</sub>], **9**, **10** · 2 THF, **11** · DCM.

|                                                                | [Cl <sub>2</sub> Sn(μ-bztzS) <sub>2</sub> Ni-PPh <sub>3</sub> ] <sup>1</sup>        | <b>9</b>                                                                            | <b>10</b> · 2 THF <sup>2</sup>                                                                                               | <b>11</b> · DCM                                                                                    |
|----------------------------------------------------------------|-------------------------------------------------------------------------------------|-------------------------------------------------------------------------------------|------------------------------------------------------------------------------------------------------------------------------|----------------------------------------------------------------------------------------------------|
| Empirical formula                                              | C <sub>32</sub> H <sub>23</sub> Cl <sub>2</sub> N <sub>2</sub> NiPS <sub>4</sub> Sn | C <sub>28</sub> H <sub>41</sub> Cl <sub>2</sub> N <sub>2</sub> PPdS <sub>2</sub> Sn | C <sub>48</sub> H <sub>48</sub> Cl <sub>8</sub> N <sub>8</sub> O <sub>2</sub> Pd <sub>4</sub> S <sub>8</sub> Sn <sub>4</sub> | C <sub>40</sub> H <sub>34</sub> Cl <sub>2</sub> N <sub>5</sub> O <sub>2</sub> PPdS <sub>2</sub> Sn |
| Formula weight                                                 | 843.03                                                                              | 796.71                                                                              | 2209.38                                                                                                                      | 1007.80                                                                                            |
| <i>T</i> (K)                                                   | 150(2)                                                                              | 150(2)                                                                              | 150(2)                                                                                                                       | 150(2)                                                                                             |
| $\lambda$ (Å)                                                  | 0.71073                                                                             |                                                                                     |                                                                                                                              |                                                                                                    |
| Crystal system                                                 | Monoclinic                                                                          | Monoclinic                                                                          | Tetragonal                                                                                                                   | Triclinic                                                                                          |
| Space group                                                    | <i>Cm</i>                                                                           | <i>P</i> 2 <sub>1</sub> / <i>m</i>                                                  | <i>I</i> -4                                                                                                                  | <i>P</i> -1                                                                                        |
| Unit cell dimensions.                                          |                                                                                     |                                                                                     |                                                                                                                              |                                                                                                    |
| <i>a</i> (Å)                                                   | 7.8975(3)                                                                           | 8.2710(6)                                                                           | 11.8143(3)                                                                                                                   | 11.5645(4)                                                                                         |
| <i>b</i> (Å)                                                   | 17.3839(6)                                                                          | 16.4657(8)                                                                          | 11.8143(3)                                                                                                                   | 12.0423(4)                                                                                         |
| <i>c</i> (Å)                                                   | 12.3904(5)                                                                          | 12.0613(8)                                                                          | 24.1508(8)                                                                                                                   | 15.0296(4)                                                                                         |
| $\alpha$ (°)                                                   | 90                                                                                  | 90                                                                                  | 90                                                                                                                           | 80.499(3)                                                                                          |
| $\beta$ (°)                                                    | 107.098(3)                                                                          | 109.724(5)                                                                          | 90                                                                                                                           | 73.274(2)                                                                                          |
| $\gamma$ (°)                                                   | 90                                                                                  | 90                                                                                  | 90                                                                                                                           | 84.786(3)                                                                                          |
| <i>V</i> (Å <sup>3</sup> )                                     | 1625.89(11)                                                                         | 1546.23(17)                                                                         | 3370.9(2)                                                                                                                    | 1974.93(11)                                                                                        |
| <i>Z</i> / <i>D</i> <sub>c</sub> (g cm <sup>-3</sup> )         | 2 / 1.72                                                                            | 2 / 1.71                                                                            | 2 / 2.18                                                                                                                     | 2 / 1.66                                                                                           |
| $\mu$ (mm <sup>-1</sup> )                                      | 1.8                                                                                 | 1.8                                                                                 | 3.1                                                                                                                          | 1.4                                                                                                |
| <i>F</i> (000)                                                 | 840                                                                                 | 800                                                                                 | 2112                                                                                                                         | 1004                                                                                               |
| Crystal size (mm)                                              | 0.26×0.12×0.11                                                                      | 0.17×0.09×0.04                                                                      | 0.28×0.22×0.18                                                                                                               | 0.30×0.22×0.18                                                                                     |
| $\theta$ range for data collection                             | 2.3-32.0                                                                            | 2.5-27.0                                                                            | 2.4-30.0                                                                                                                     | 2.4-30.0                                                                                           |
| Reflections collected                                          | 15598                                                                               | 14914                                                                               | 40152                                                                                                                        | 46100                                                                                              |
| Independent reflections / <i>R</i> (int)                       | 5578 / 0.0335                                                                       | 3492 / 0.0617                                                                       | 4938 / 0.0286                                                                                                                | 11510 / 0.0252                                                                                     |
| Completeness to $\theta_{\max}$                                | 99.7%                                                                               | 99.9%                                                                               | 99.9%                                                                                                                        | 99.9%                                                                                              |
| Refinement                                                     | Full-matrix least-squares on <i>F</i> <sup>2</sup>                                  |                                                                                     |                                                                                                                              |                                                                                                    |
| Data / restraints / parameters                                 | 5578 / 99 / 235                                                                     | 3492 / 0 / 178                                                                      | 4938 / 28 / 206                                                                                                              | 11510 / 0 / 448                                                                                    |
| Goodness-of-fit on <i>F</i> <sup>2</sup>                       | 1.066                                                                               | 1.021                                                                               | 1.176                                                                                                                        | 1.022                                                                                              |
| <i>R</i> 1 / <i>wR</i> 2 [ <i>I</i> > 2 $\sigma$ ( <i>I</i> )] | 0.0271 / 0.0694                                                                     | 0.0303 / 0.0613                                                                     | 0.0183 / 0.0394                                                                                                              | 0.0217 / 0.0482                                                                                    |
| <i>R</i> 1 / <i>wR</i> 2 (all data)                            | 0.0290 / 0.0705                                                                     | 0.0507 / 0.0665                                                                     | 0.0196 / 0.0400                                                                                                              | 0.0289 / 0.0501                                                                                    |
| Largest diff. peak / hole [e Å <sup>-3</sup> ]                 | 0.66 / -1.00                                                                        | 0.71 / -0.60                                                                        | 0.38 / -0.49                                                                                                                 | 0.63 / -0.86                                                                                       |

<sup>1</sup> Absolute structure parameter: -0.014(12)

<sup>2</sup> Structure refined as a racemic twin (73% / 27%)

**Table SI3** Parameters of data collection and structure refinement for the structures of **12**, **13** · 2 EtOH · DCM, Sn<sub>2</sub>(L<sup>b</sup>)<sub>2</sub>, Sn(L<sup>b</sup>)<sub>2</sub> · MeOH and [Ni<sub>2</sub>(bztzS)<sub>4</sub>].

|                                                                | <b>12</b>                                                            | <b>13</b> · 2 EtOH · DCM                                                                                                                    | Sn <sub>2</sub> (L <sup>b</sup> ) <sub>2</sub>                                | Sn(L <sup>b</sup> ) <sub>2</sub> · MeOH <sup>1</sup>             | [Ni <sub>2</sub> (bztzS) <sub>4</sub> ] <sup>2</sup>                          |
|----------------------------------------------------------------|----------------------------------------------------------------------|---------------------------------------------------------------------------------------------------------------------------------------------|-------------------------------------------------------------------------------|------------------------------------------------------------------|-------------------------------------------------------------------------------|
| Empirical formula                                              | C <sub>39</sub> H <sub>31</sub> N <sub>4</sub> OPPdS <sub>2</sub> Sn | C <sub>61</sub> H <sub>62</sub> Cl <sub>4</sub> N <sub>4</sub> O <sub>4</sub> P <sub>2</sub> Pd <sub>2</sub> S <sub>4</sub> Sn <sub>2</sub> | C <sub>22</sub> H <sub>16</sub> N <sub>4</sub> O <sub>2</sub> Sn <sub>2</sub> | C <sub>23</sub> H <sub>20</sub> N <sub>4</sub> O <sub>3</sub> Sn | C <sub>28</sub> H <sub>16</sub> N <sub>4</sub> Ni <sub>2</sub> S <sub>8</sub> |
| Formula weight                                                 | 891.86                                                               | 1697.31                                                                                                                                     | 605.81                                                                        | 519.12                                                           | 782.35                                                                        |
| <i>T</i> (K)                                                   | 200(2)                                                               | 150(2)                                                                                                                                      | 150(2)                                                                        | 200(2)                                                           | 100(2)                                                                        |
| $\lambda$ (Å)                                                  | 0.71073                                                              |                                                                                                                                             |                                                                               |                                                                  |                                                                               |
| Crystal system                                                 | Orthorhombic                                                         | Orthorhombic                                                                                                                                | Orthorhombic                                                                  | Monoclinic                                                       | Orthorhombic                                                                  |
| Space group                                                    | <i>Pbca</i>                                                          | <i>Pbca</i>                                                                                                                                 | <i>Pbcn</i>                                                                   | <i>P2<sub>1</sub>/c</i>                                          | <i>Pbca</i>                                                                   |
| Unit cell dimensions.                                          |                                                                      |                                                                                                                                             |                                                                               |                                                                  |                                                                               |
| <i>a</i> (Å)                                                   | 13.2982(3)                                                           | 16.4638(4)                                                                                                                                  | 12.0878(2)                                                                    | 9.3183(2)                                                        | 14.8803(4)                                                                    |
| <i>b</i> (Å)                                                   | 16.9219(4)                                                           | 22.8991(5)                                                                                                                                  | 10.4438(2)                                                                    | 23.7683(5)                                                       | 16.4815(4)                                                                    |
| <i>c</i> (Å)                                                   | 32.2817(7)                                                           | 17.3745(6)                                                                                                                                  | 15.6612(3)                                                                    | 10.2246(3)                                                       | 24.0587(7)                                                                    |
| $\alpha$ (°)                                                   | 90                                                                   | 90                                                                                                                                          | 90                                                                            | 90                                                               | 90                                                                            |
| $\beta$ (°)                                                    | 90                                                                   | 90                                                                                                                                          | 90                                                                            | 106.442(2)                                                       | 90                                                                            |
| $\gamma$ (°)                                                   | 90                                                                   | 90                                                                                                                                          | 90                                                                            | 90                                                               | 90                                                                            |
| <i>V</i> (Å <sup>3</sup> )                                     | 7264.4(3)                                                            | 6550.3(3)                                                                                                                                   | 1977.11(6)                                                                    | 2171.94(9)                                                       | 5900.4(3)                                                                     |
| <i>Z</i> / <i>D<sub>c</sub></i> (g cm <sup>-3</sup> )          | 8 / 1.63                                                             | 4 / 1.72                                                                                                                                    | 4 / 2.04                                                                      | 4 / 1.56                                                         | 8 / 1.76                                                                      |
| $\mu$ (mm <sup>-1</sup> )                                      | 1.4                                                                  | 1.7                                                                                                                                         | 2.6                                                                           | 1.2                                                              | 1.9                                                                           |
| <i>F</i> (000)                                                 | 3552                                                                 | 3368                                                                                                                                        | 1168                                                                          | 1040                                                             | 3168                                                                          |
| Crystal size (mm)                                              | 0.25×0.18×0.10                                                       | 0.35×0.18×0.08                                                                                                                              | 0.35×0.25×0.18                                                                | 0.25×0.15×0.12                                                   | 0.25×0.20×0.04                                                                |
| $\theta$ range for data collection                             | 2.4-30.0                                                             | 2.5-28.0                                                                                                                                    | 2.6-37.0                                                                      | 1.7-32.0                                                         | 2.0-25.0                                                                      |
| Reflections collected                                          | 91301                                                                | 53202                                                                                                                                       | 25040                                                                         | 45224                                                            | 40361                                                                         |
| Independent reflections / <i>R</i> (int)                       | 10588 / 0.0439                                                       | 7894 / 0.0498                                                                                                                               | 4990 / 0.0279                                                                 | 7517 / 0.0362                                                    | 5195 / 0.0774                                                                 |
| Completeness to $\theta_{\max}$                                | 99.9%                                                                | 99.9%                                                                                                                                       | 99.2%                                                                         | 99.7%                                                            | 100%                                                                          |
| Refinement                                                     | Full-matrix least-squares on <i>F</i> <sup>2</sup>                   |                                                                                                                                             |                                                                               |                                                                  |                                                                               |
| Data / restraints / parameters                                 | 10588 / 0 / 442                                                      | 7894 / 1 / 381                                                                                                                              | 4990 / 0 / 136                                                                | 7517 / 1 / 301                                                   | 5195 / 0 / 380                                                                |
| Goodness-of-fit on <i>F</i> <sup>2</sup>                       | 1.050                                                                | 1.050                                                                                                                                       | 1.042                                                                         | 1.149                                                            | 1.011                                                                         |
| <i>R</i> 1 / <i>wR</i> 2 [ <i>I</i> > 2 $\sigma$ ( <i>I</i> )] | 0.0237 / 0.0476                                                      | 0.0344 / 0.0724                                                                                                                             | 0.0222 / 0.0544                                                               | 0.0278 / 0.0702                                                  | 0.0364 / 0.0820                                                               |
| <i>R</i> 1 / <i>wR</i> 2 (all data)                            | 0.0334 / 0.0502                                                      | 0.0527 / 0.0779                                                                                                                             | 0.0364 / 0.0579                                                               | 0.0312 / 0.0719                                                  | 0.0604 / 0.0883                                                               |
| Largest diff. peak / hole [e Å <sup>-3</sup> ]                 | 0.42 / -0.56                                                         | 0.97 / -0.94                                                                                                                                | 0.65 / -0.50                                                                  | 0.62 / -0.77                                                     | 0.65 / -0.48                                                                  |

<sup>1</sup> extinction coefficient: 0.0082(6)

<sup>2</sup> extinction coefficient: 0.0011(1)

$^{119}\text{Sn}$  Mössbauer spectra of compounds **2**, **3**,  $[\text{Cl}_2\text{Sn}(\mu\text{-bztzS})_2\text{NiPPh}_3]$ , **9**, **10**, **11**, **12**, **13**,  $\text{Sn}_2(\text{L}^b)_2$  and  $\text{Sn}(\text{L}^b)_2$  and parameters of the fitting procedure:

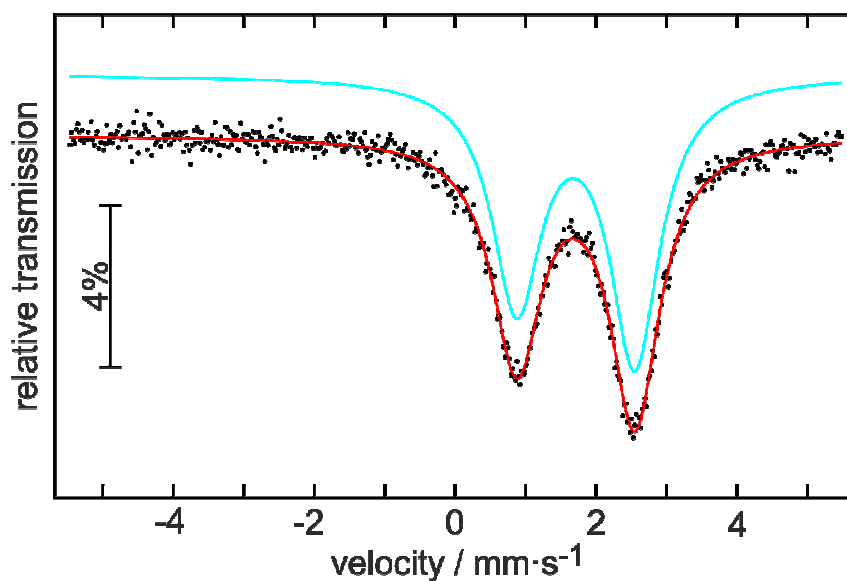

**Fig. SI5**  $^{119}\text{Sn}$  Mössbauer spectrum of **2** at 78 K.

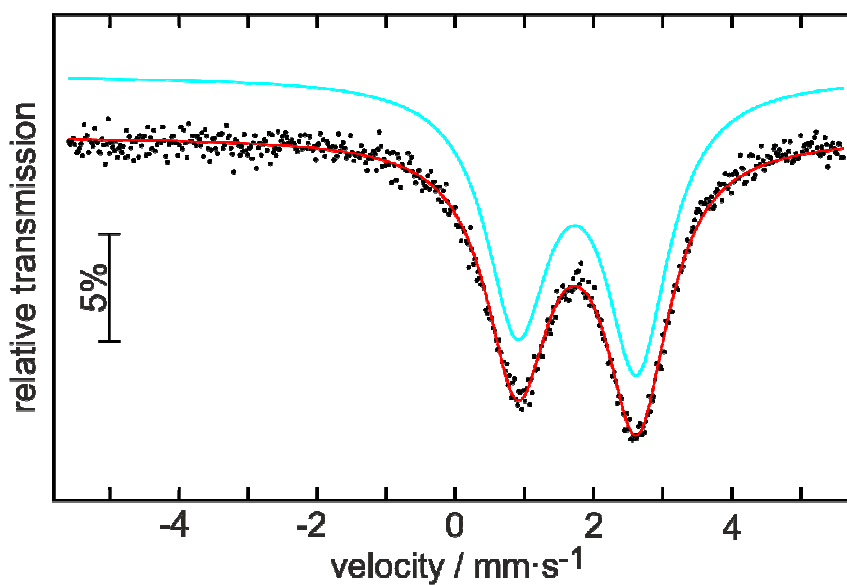

**Fig. SI6**  $^{119}\text{Sn}$  Mössbauer spectrum of **2** at 5 K.



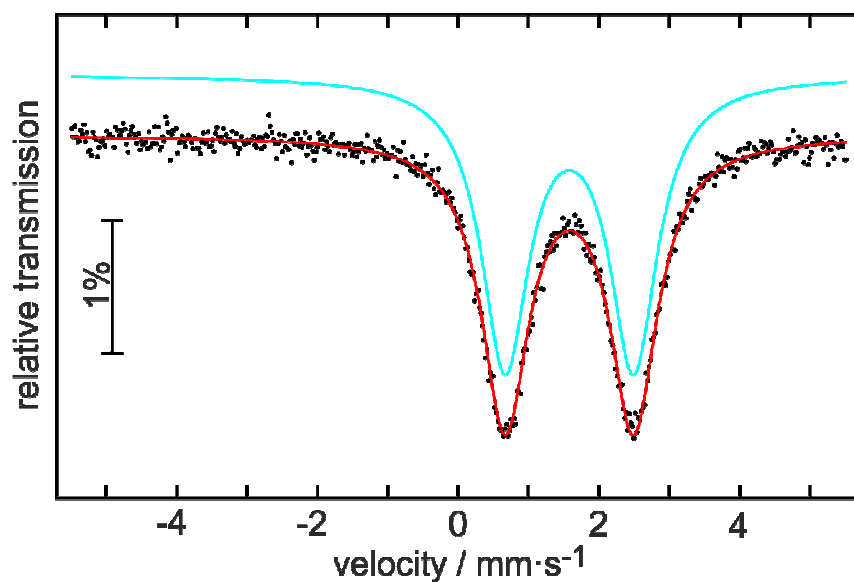

Fig. SI7 <sup>119</sup>Sn Mössbauer spectrum of **3** at 78 K.

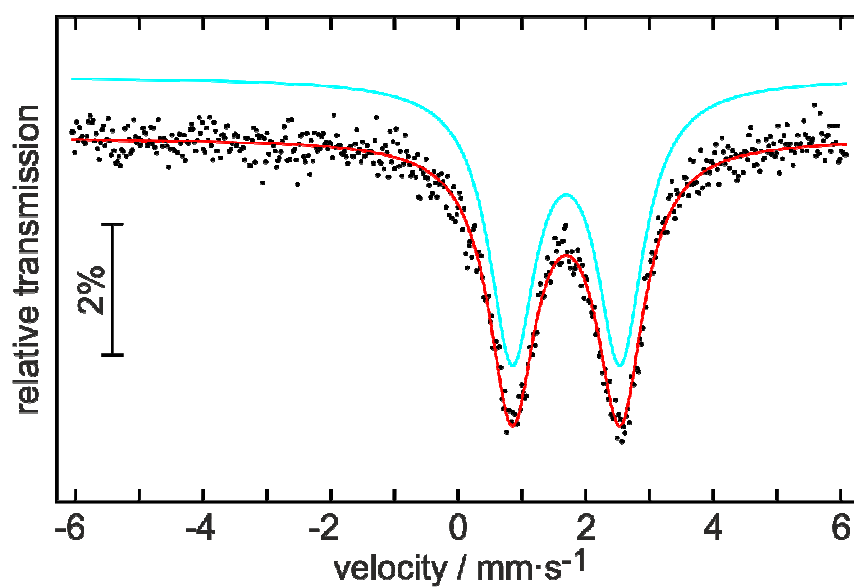

Fig. SI8 <sup>119</sup>Sn Mössbauer spectrum of [Cl<sub>2</sub>Sn(μ-bztzS)<sub>2</sub>NiPPh<sub>3</sub>] at 78 K.

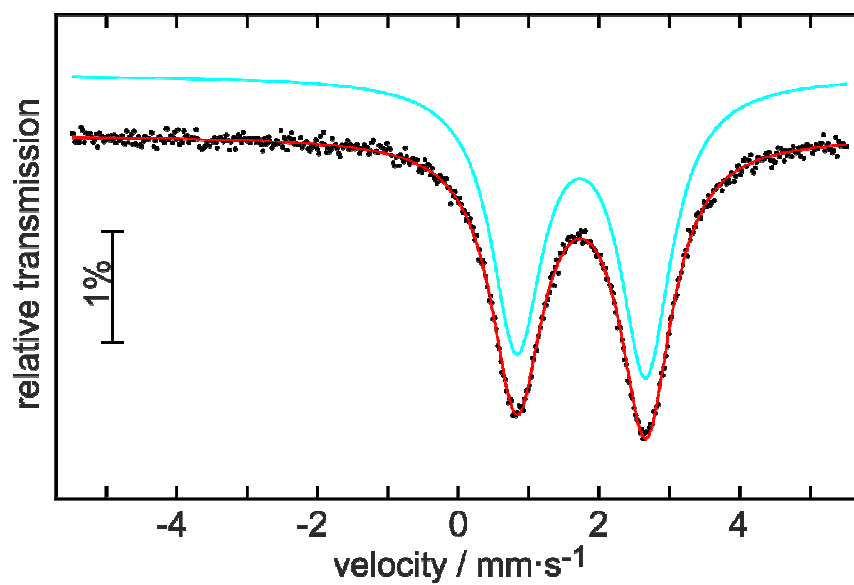

Fig. SI9 <sup>119</sup>Sn Mössbauer spectrum of **9** at 78 K.

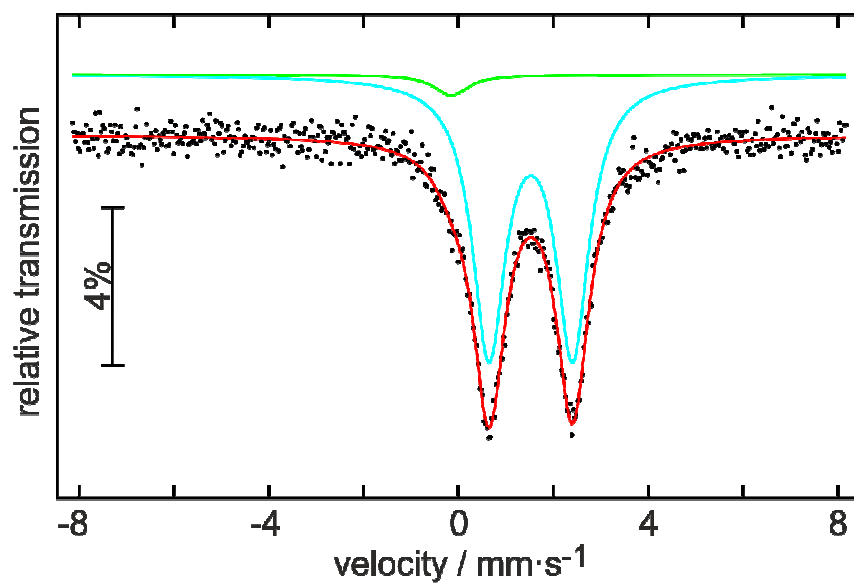

Fig. SI10 <sup>119</sup>Sn Mössbauer spectrum of **10** at 78 K.

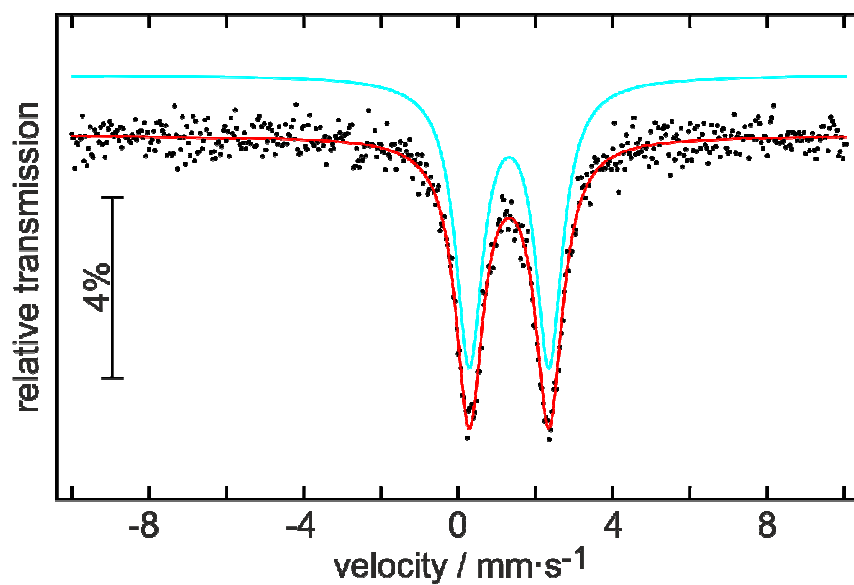

Fig. SI11  $^{119}\text{Sn}$  Mössbauer spectrum of **11** at 78 K.

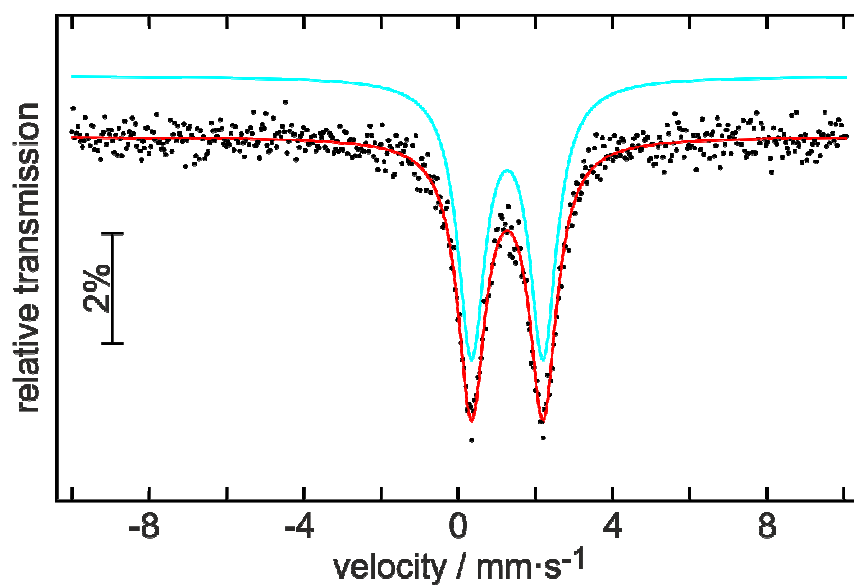

Fig. SI12  $^{119}\text{Sn}$  Mössbauer spectrum of **12** at 78 K.

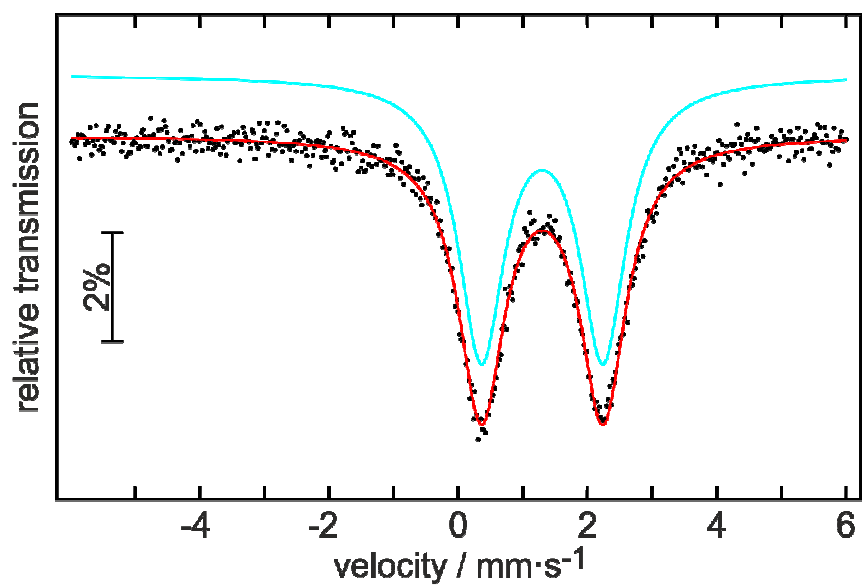

Fig. SI13 <sup>119</sup>Sn Mössbauer spectrum of **13** at 78 K.

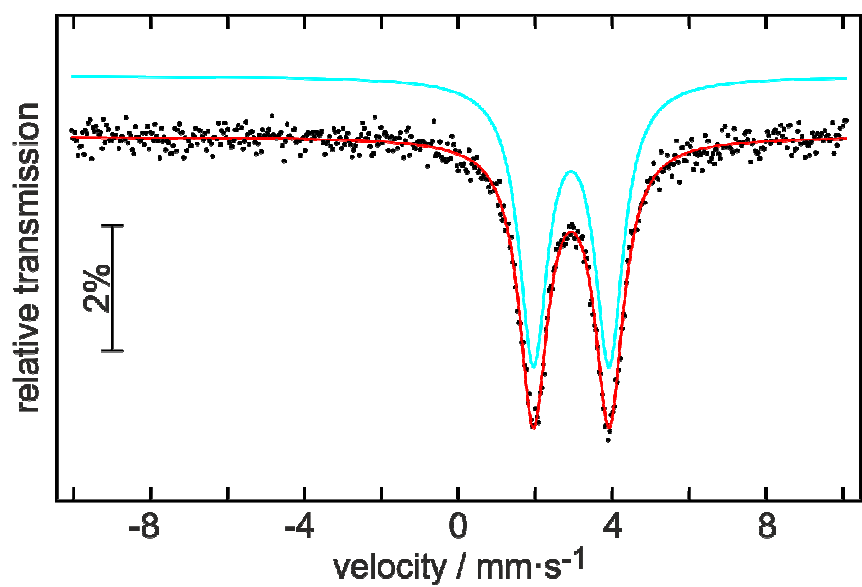

Fig. SI14 <sup>119</sup>Sn Mössbauer spectrum of Sn<sub>2</sub>(L<sup>b</sup>)<sub>2</sub> at 78 K.

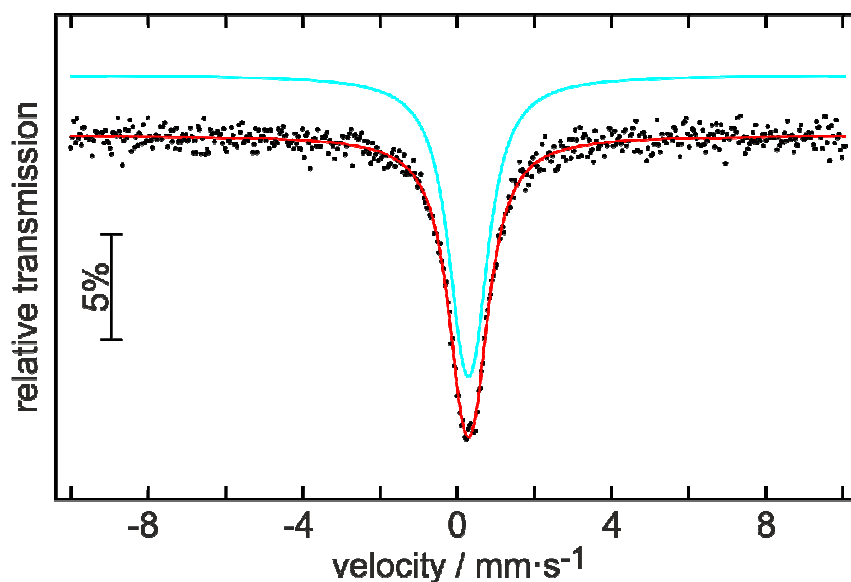

Fig. SI15  $^{119}\text{Sn}$  Mössbauer spectrum of  $\text{Sn}(\text{L}^{\text{b}})_2$  at 78 K.

**Table SI4** Fitting parameters of the  $^{119}\text{Sn}$  Mössbauer spectroscopic investigations.  $\delta$ : isomer shift,  $\Delta$ : electric quadrupole splitting,  $\Gamma$ : experimental line width [ $\text{mm s}^{-1}$ ] at 78 K. a) Asymmetry ( $A_{21}$ ) [ $\text{mm s}^{-1}$ ] = 1.25(1); b)  $A_{21}$  = 1.16(1); c)  $A_{21}$  = 1.10 (1); \* parameter kept fixed during fitting procedure.

| Compound                                                   | $\delta$ | $\Delta$ | $\Gamma$ |
|------------------------------------------------------------|----------|----------|----------|
| <b>2</b> <sup>a</sup>                                      | 1.71(1)  | 1.68(1)  | 0.85(1)  |
| <b>2</b> (5K) <sup>b</sup>                                 | 1.76(1)  | 1.73(1)  | 1.11(1)  |
| <b>3</b>                                                   | 1.58(1)  | 1.83(1)  | 0.82(1)  |
| $[\text{Cl}_2\text{Sn}(\mu\text{-bztzS})_2\text{NiPPh}_3]$ |          |          |          |
|                                                            | 1.69(1)  | 1.69(1)  | 0.89(1)  |
| <b>9</b> <sup>c</sup>                                      | 1.75(1)  | 1.83(1)  | 0.88(1)  |
| <b>10</b>                                                  | 1.53(1)  | 1.77(1)  | 0.84(1)  |
| impurity (4%)                                              | -0.15(1) | 0*       | 0.85*    |
| <b>11</b>                                                  | 1.32(1)  | 2.06(1)  | 0.85(1)  |
| <b>12</b>                                                  | 1.27(1)  | 1.86(1)  | 0.85(1)  |
| <b>13</b>                                                  | 1.30(1)  | 1.88(1)  | 0.86(1)  |
| $\text{Sn}_2(\text{L}^{\text{b}})_2$                       | 2.94(1)  | 1.97(1)  | 0.91(2)  |
| $\text{Sn}(\text{L}^{\text{b}})_2$                         | 0.29(1)  | 0.43(1)  | 0.9*     |

## Quantum chemical calculations:

Optimizations of the molecular structures have been carried out using DFT methodology as implemented in the `adf2012.01a` and `adf2013.01a` software packages.<sup>2</sup> The X-ray structure of the Ge/Pd heterobimetallic complex **4** was used as starting point for the full optimisation for the Si/Pd complex **5**. For all other calculations, the non-H atomic coordinates obtained from the crystal structures (after exclusion of solvent molecules) have been kept constant while the hydrogen atoms have been relaxed. The optimizations have been carried out using scalar relativistic corrections,<sup>3</sup> applying a Triple-Zeta polarised (TZP) basis set for the elements of the first and second row of the periodic table, and a Triple-Zeta double polarised (TZ2P) basis set for the heavier elements.<sup>4</sup> NBO/NLMO analyses have been carried out with `adf2013.01a`<sup>2</sup> using NBO version 6.0.<sup>5</sup> The calculations have been carried out using hybrid PBE<sup>6</sup> functional and all electron ZORA TZ2P basis set<sup>4</sup> and scalar relativistics<sup>3</sup> for the optimised molecular structures.

For the optimization of Sn(II) and Sn(IV) benchmark compounds the atomic coordinates from the crystal structures of  $\text{SnCl}_4$ <sup>7</sup>,  $\text{SnCl}_5^-$ <sup>8</sup>,  $\text{SnCl}_6^{2-}$ <sup>9</sup>,  $\text{SnCl}_3^-$ <sup>10</sup> and  $\text{SnCl}_4^{2-}$ <sup>9</sup> were used. In the case of  $\text{SnCl}_4^{2-}$  the axial Cl-Sn-Cl bond angle of the see-saw shaped anion was constrained in order to retain this relative molecular arrangement. The other chlorotin compounds were optimized without any constraints.

## Optimization of the structure of **5**

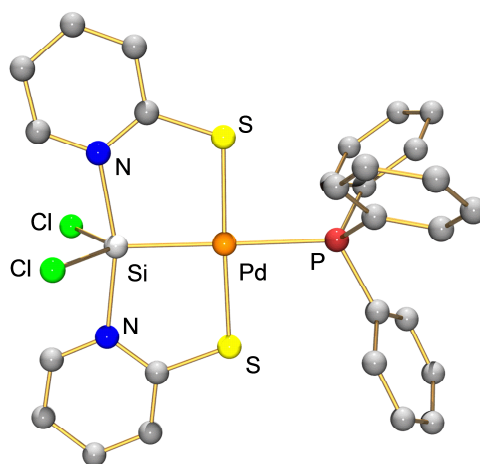

**Fig. SI16** Molecular structure (gas phase) of **5** (H atoms are not depicted) after full optimization. Selected bond lengths [ $\text{\AA}$ ]: Pd-Si 2.352, Pd-S 2.312, Pd-S 2.299, Pd-P 2.429, Si-N 2.095, Si-N 2.073, Si-Cl 2.142, Si-Cl 2.142.

**Table SI5** Atomic coordinates of **5** after full optimisation.

|    |             |             |             |
|----|-------------|-------------|-------------|
| H  | -1.35564128 | -1.47628643 | -4.73659684 |
| H  | -3.35503656 | -2.96984389 | -4.70318289 |
| C  | -1.94617042 | -1.58308586 | -3.82556245 |
| C  | -3.06583692 | -2.42095820 | -3.80432532 |
| H  | -4.67050407 | -3.23164624 | -2.59870834 |
| C  | -3.80422412 | -2.56730082 | -2.62559053 |
| H  | -0.67195292 | -0.26865842 | -2.67645832 |
| C  | -1.56541358 | -0.89628083 | -2.67083898 |
| H  | -4.44998932 | 3.50130062  | -2.26643950 |
| H  | -3.34995773 | 1.28358820  | -2.17616771 |
| Cl | 4.28502077  | 0.01840815  | -1.65469657 |
| C  | -3.93189372 | 3.19426736  | -1.35594069 |
| C  | -3.30953249 | 1.94220502  | -1.30707919 |
| C  | -3.43410058 | -1.87073256 | -1.47156486 |
| C  | -2.31524098 | -1.02492350 | -1.48832022 |
| H  | -4.38152270 | 5.02051601  | -0.28636196 |
| H  | -4.00951118 | -2.00061301 | -0.55412602 |
| C  | -3.89335614 | 4.04406354  | -0.24677809 |
| C  | -2.64348479 | 1.53116174  | -0.14357159 |
| H  | 5.32848644  | 2.03209710  | -0.06897907 |
| H  | 5.96238593  | -4.06193682 | 0.62351436  |
| H  | 5.40019282  | -1.63540616 | 0.52838713  |
| H  | 5.73843868  | 4.48780684  | -0.20614150 |
| C  | 4.50367473  | 2.74061005  | -0.10175073 |
| C  | 4.93287151  | -3.74087410 | 0.46953229  |
| C  | 4.62995947  | -2.39610324 | 0.42044430  |
| C  | 4.72114542  | 4.09993490  | -0.17777583 |
| N  | 3.26310205  | 2.18973843  | -0.06876063 |
| P  | -1.74448875 | -0.06846938 | -0.02687937 |
| Si | 3.03000132  | 0.13545465  | 0.07656763  |
| N  | 3.36893048  | -1.92469375 | 0.24619505  |
| H  | 4.07042503  | -5.73767208 | 0.35063554  |
| C  | 3.87843429  | -4.66316237 | 0.31904364  |
| C  | 2.17010198  | 2.99050842  | -0.09531371 |
| C  | 3.59733176  | 4.94972359  | -0.21932973 |
| S  | 0.56918375  | 2.34955802  | -0.03096280 |
| Pd | 0.68085197  | 0.05317971  | -0.00177959 |
| C  | 2.34290743  | -2.79682619 | 0.09581703  |
| H  | 3.72153513  | 6.03254414  | -0.28363069 |
| C  | 2.59447018  | -4.19430178 | 0.12997035  |
| C  | 2.33314218  | 4.39934376  | -0.17667795 |
| S  | 0.72170203  | -2.25396483 | -0.15031385 |
| H  | 1.75149247  | -4.87238282 | 0.00575994  |
| H  | 1.43792586  | 5.01976048  | -0.20257573 |
| C  | -3.22182089 | 3.64159223  | 0.91352962  |
| C  | -2.59428029 | 2.39682350  | 0.96433095  |
| H  | -4.51505219 | -0.04997781 | 1.04314053  |
| H  | -3.17969972 | 4.30212423  | 1.78121514  |
| C  | -2.53412208 | -0.83901025 | 1.44598382  |
| H  | -2.06574583 | 2.09404346  | 1.86931063  |
| C  | -3.90440592 | -0.65881637 | 1.71194179  |
| Cl | 4.09893013  | 0.30877882  | 1.92486772  |
| H  | -0.68876378 | -1.72189327 | 2.14241683  |
| C  | -1.75333263 | -1.58831505 | 2.34000177  |
| C  | -4.48331319 | -1.23542849 | 2.84439045  |
| H  | -5.54640890 | -1.08704065 | 3.04226268  |
| C  | -2.33618018 | -2.16049959 | 3.47485796  |
| C  | -3.69991022 | -1.98753467 | 3.72796656  |
| H  | -1.71668007 | -2.73594357 | 4.16530543  |
| H  | -4.15209964 | -2.43015997 | 4.61797209  |

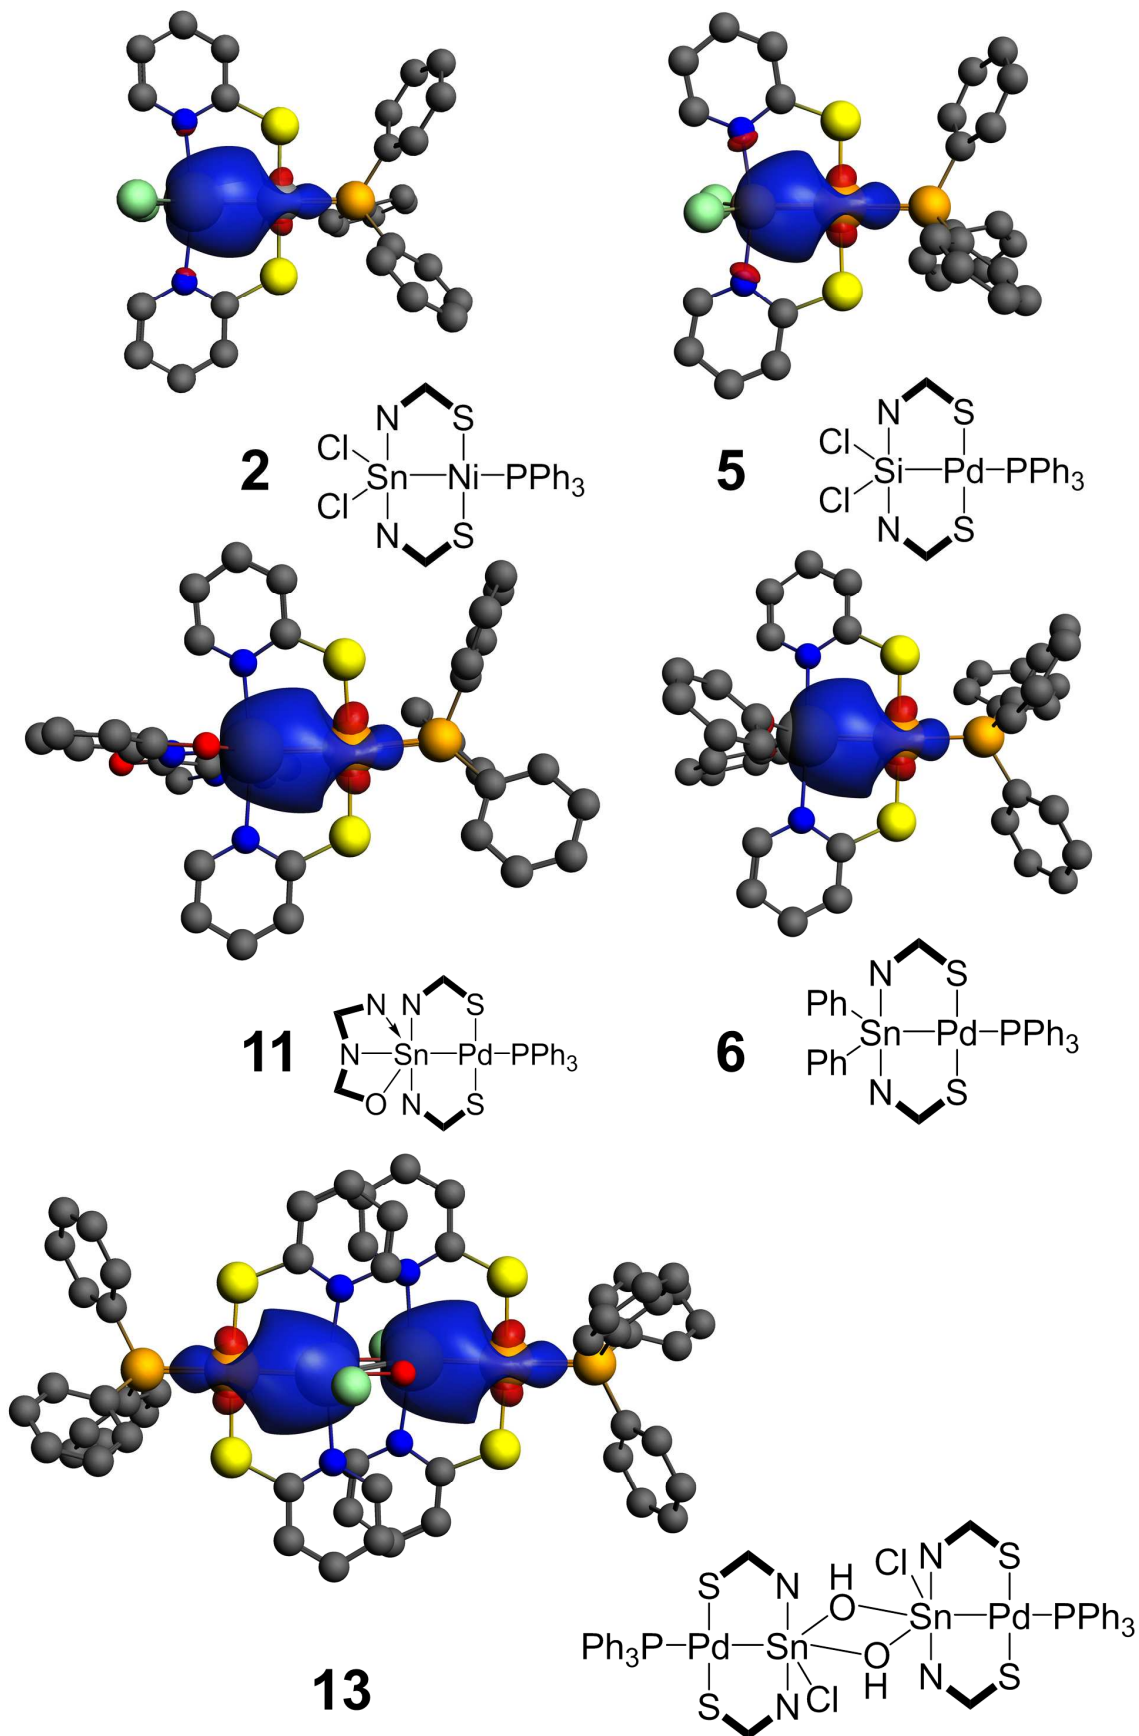

**Fig. SI17** NLMOs of the E-TM bonds in **2**, **5**, **6**, **11** and **13** (plotted at an isosurface value of 0.03 e).



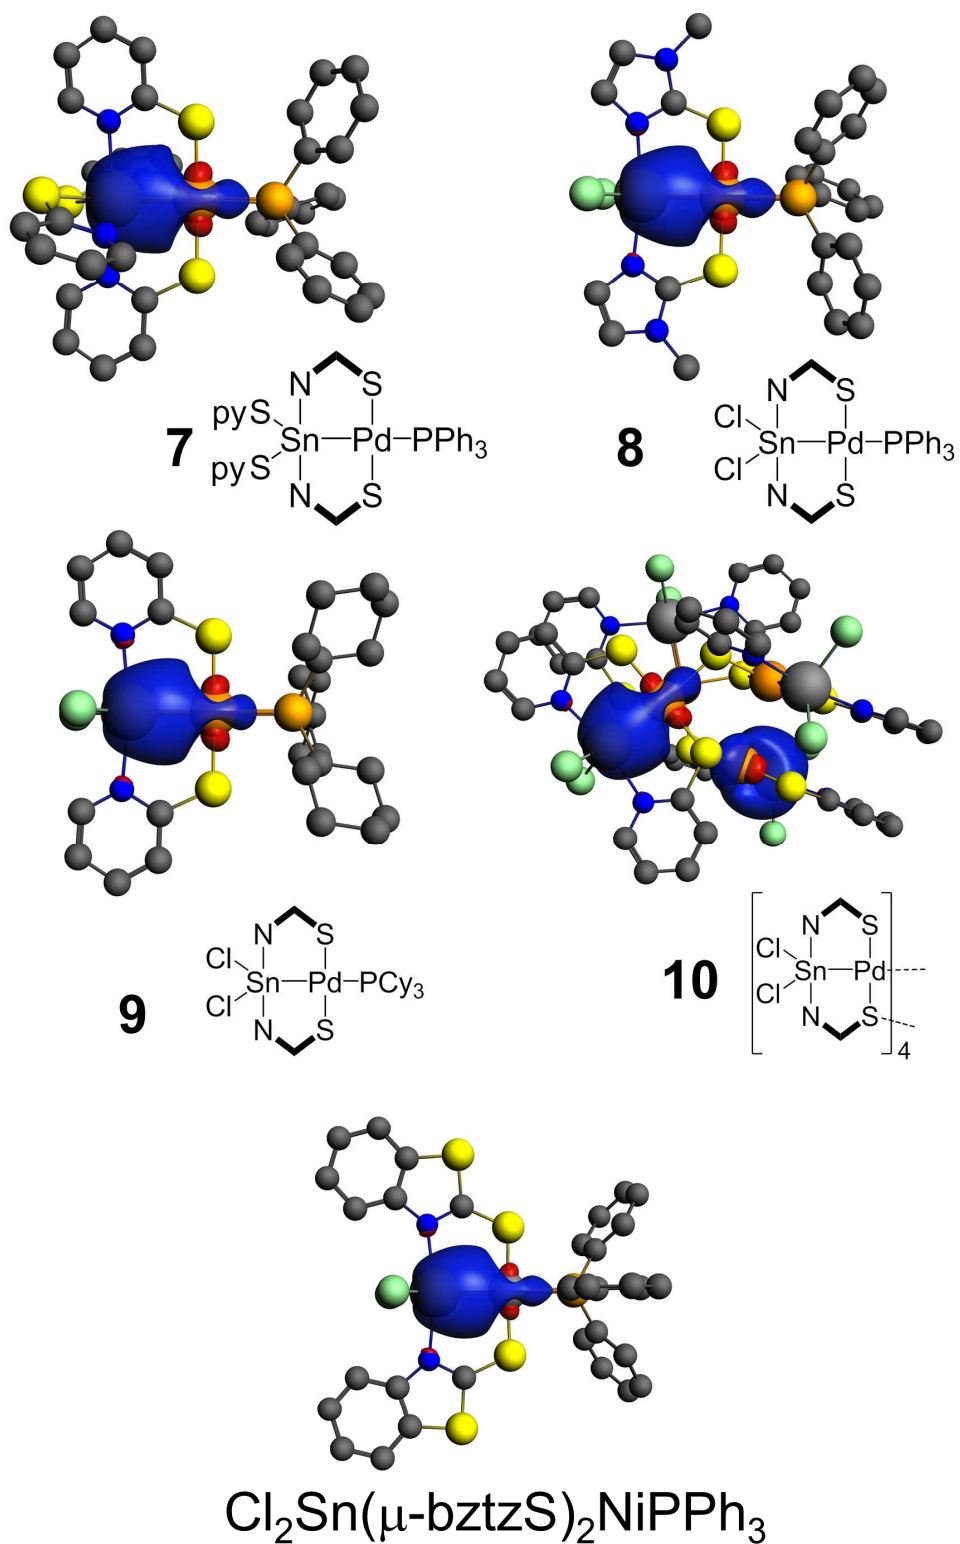

**Fig. SI18** NLMOs of the E–TM bonds in **7**, **8**, **9**, **10** and  $[\text{Cl}_2\text{Sn}(\mu\text{-bztzS})_2\text{NiPPh}_3]$  (plotted at an isosurface value of 0.03 e). For clarity, only two of the four equivalent NLMOs of compound **10** are shown.

**Table SI6** Atomic coordinates of SnCl<sub>4</sub> after full optimisation.

|    |           |           |           |
|----|-----------|-----------|-----------|
| Sn | -0.000035 | 0.000760  | -0.000053 |
| Cl | 0.095376  | 1.865674  | -1.376428 |
| Cl | 0.752514  | -1.860393 | -1.165775 |
| Cl | -2.190293 | -0.351026 | 0.681144  |
| Cl | 1.342428  | 0.344985  | 1.861103  |

**Table SI7** Atomic coordinates of SnCl<sub>5</sub><sup>-</sup> after full optimisation.

|    |           |           |           |
|----|-----------|-----------|-----------|
| Cl | -0.153435 | 1.790039  | -1.610294 |
| Cl | 1.583451  | -1.158604 | -1.465750 |
| Cl | -1.517980 | -1.857508 | -0.130717 |
| Cl | -1.562373 | 1.196727  | 1.450853  |
| Cl | 1.648622  | 0.025569  | 1.756456  |
| Sn | 0.001704  | 0.003777  | -0.000559 |

**Table SI8** Atomic coordinates of SnCl<sub>6</sub><sup>2-</sup> after full optimisation.

|    |           |           |           |
|----|-----------|-----------|-----------|
| Sn | 0.000000  | 0.000000  | 0.000000  |
| Cl | -1.780986 | 1.780986  | 0.000000  |
| Cl | -1.780986 | -1.780986 | 0.000000  |
| Cl | 0.000000  | 0.000000  | 2.512960  |
| Cl | 0.000000  | 0.000000  | -2.512960 |
| Cl | 1.780986  | 1.780986  | 0.000000  |
| Cl | 1.780986  | -1.780986 | 0.000000  |

**Table SI9** Atomic coordinates of SnCl<sub>3</sub><sup>-</sup> after full optimisation.

|    |           |           |           |
|----|-----------|-----------|-----------|
| Sn | -0.000035 | 0.000760  | -0.000053 |
| Cl | 0.095376  | 1.865674  | -1.376428 |
| Cl | 0.752514  | -1.860393 | -1.165775 |
| Cl | -2.190293 | -0.351026 | 0.681144  |
| Cl | 1.342428  | 0.344985  | 1.861103  |

**Table SI10** Atomic coordinates of SnCl<sub>4</sub><sup>2-</sup> after partial optimisation (axial Cl-Sn-Cl angle constrained).

|    |           |           |           |
|----|-----------|-----------|-----------|
| Cl | 0.000000  | 2.028952  | 0.920525  |
| Cl | 2.805881  | 0.000000  | -0.600003 |
| Cl | -2.805881 | 0.000000  | -0.600003 |
| Cl | 0.000000  | -2.028952 | 0.920525  |
| Sn | 0.000000  | 0.000000  | -0.688356 |

## References:

- 1 L. Ballester, A. Gutierrez, M. F. Perpiñan, T. Rico, *Polyhedron*, 1994, 13, 2277–2283.
- 2 a) ADF2012.01: J. Autschbach, D. Bashford, A. Brces, F. M. Bickelhaupt, C. Bo, P. M. Boerrigter, L. Cavallo, D. P. Chong, L. Deng, R. M. Dickson, D. E. Ellis, M. van Faassen, L. Fan, T. H. Fischer, C. Fonseca Guerra, A. Ghysels, A. Giammona, S. J. A. van Gisbergen, A. W. Götz, J. A. Groeneveld, O. V. Gritsenko, M. Grüning, S. Gusarov, F. E. Harris, P. van den Hoek, C. R. Jacob, H. Jacobsen, L. Jensen, J. W. Kaminski, G. van Kessel, F. Kootstra, A. Kovalenko, M. V. Krykunov, E. van Lenthe, D. A. McCormack, A. Michalak, M. Mitoraj, J. Neugebauer, V. P. Nicu, L. Noodleman, V. P. Osinga, S. Patchkovskii, P. H. T. Philipsen, D. Post, C. C. Pye, W. Ravenek, J. I. Rodriguez, P. Ros, P. R. T. Schipper, G. Schreckenbach, J. S. Seldenthuis, M. Seth, J. G. Snijders, M. Sol, M. Swart, D. Swerhone, G. te Velde, P. Vernooijs, L. Versluis, L. Visscher, O. Visser, F. Wang, T. A. Wesolowski, E. M. van Wezenbeek, G. Wiesenekker, S. K. Wolff, T. K. Woo, A. L. Yakovlev, E. J. Baerends, T. Ziegler. ADF2012, scm, theoretical chemistry, Vrije Universiteit, Amsterdam, the Netherlands, <http://www.scm.com>. ADF2012, SCM;  
b) J. Autschbach, D. Bashford, A. Brces, F.M. Bickelhaupt, C. Bo, P.M. Boerrigter, L. Cavallo, D.P. Chong, L. Deng, R.M. Dickson, D.E. Ellis, M. van Faassen, L. Fan, T.H. Fischer, C. Fonseca Guerra, A. Ghysels, A. Giammona, S.J.A. van Gisbergen, A.W. Götz, J.A. Groeneveld, O.V. Gritsenko, M. Grüning, S. Gusarov, F.E. Harris, P. van den Hoek, C.R. Jacob, H. Jacobsen, L. Jensen, J.W. Kaminski, G. van Kessel, F. Kootstra, A. Kovalenko, M.V. Krykunov, E. van Lenthe, D.A. McCormack, A. Michalak, M. Mitoraj, J. Neugebauer, V.P. Nicu, L. Noodleman, V.P. Osinga, S. Patchkovskii, P.H.T. Philipsen, D. Post, C.C. Pye, W. Ravenek, J.I. Rodriguez, P. Ros, P.R.T. Schipper, G. Schreckenbach, J.S. Seldenthuis, M. Seth, J.G. Snijders, M. Sol, M. Swart, D. Swerhone, G. te Velde, P. Vernooijs, L. Versluis, L. Visscher, O. Visser, F. Wang, T.A. Wesolowski, E.M. van Wezenbeek, G. Wiesenekker, S.K. Wol, T.K. Woo, A.L. Yakovlev, E.J. Baerends, T. Ziegler. ADF2013, SCM, Theoretical Chemistry, Vrije Universiteit, Amsterdam, The Netherlands, <http://www.scm.com>.  
c) ADF2010.01: C. Fonseca Guerra, J. G. Snijders, G. te Velde, E. J. Baerends, *Theor. Chem. Acc.*, 1998, **99**, 391–403; G. te Velde, F. M. Bickelhaupt, E. J. Baerends, C. Fonseca Guerra, S. J. A. van Gisbergen, J. G. Snijders, T. Ziegler, *J. Comput. Chem.*, 2001, **22**, 931–967; <http://scm.com>.
- 3 E. van Lenthe, E.J. Baerends, J.G. Snijders, *J. Chem. Phys.*, 1993, **99**, 4597–4610.
- 4 E. van Lenthe, E. J. Baerends, *J. Comput. Chem*, 2003, **24**, 1142–1156.
- 5 E. D. Glendening, J. K. Badenhoop, A. E. Reed, J. E. Carpenter, J. A. Bohmann, C. M. Morales, A. F. Weinhold. NBO version 6.0. Theoretical Chemistry Institute, University of Wisconsin, Madison, WI, 2013, <http://nbo6.chem.wisc.edu/>.
- 6 C. Adamo, V. Barone, *J. Chem. Phys.* 1999, **110(13)**, 6158–6170.
- 7 H. Reuter, R. Pawlak, *Z. Anorg. Allg. Chem.* 2000, **626**, 925–929.
- 8 Anion from crystal structure CCDC-626261 reported in: A. J. Boyall, K. B. Dillon, J. A. K. Howard, P. K. Monks, A. L. Thompson, *Dalton Trans.* 2007, 1374–1376.
- 9 Anion from crystal structure CCDC-265895 reported in: S. Rabe, W. Bubenheim, U. Mueller, *Z. Kristallogr.* 2004, **219**, 101–105.

- 10 Anion from crystal structure CCDC-1111797 reported in: U. Mueller, N. Mronga, C. Schumacher, K. Denicke, *Z. Naturforsch.* 1982, **37B**, 1122–1126.
